# Supplementary material
Source: Springer Nature journal article supplement (https://www.springermedizin.de/resource/supplementary/12967_2007_215_MOESM7_ESM.pdf/9575962)

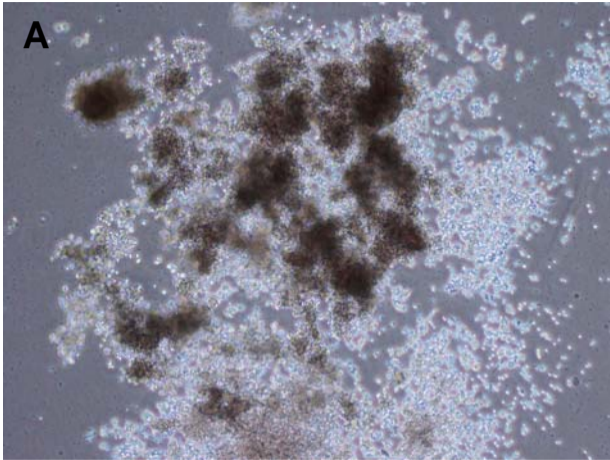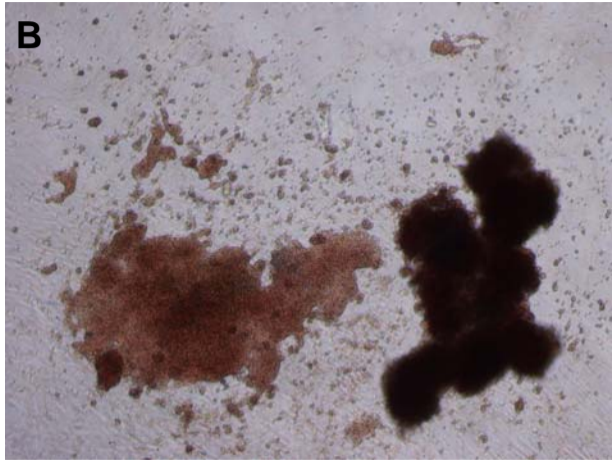

Supplement: MOESM7 [file 9575962]
